# Supplementary material for: A Prospective Observational Study on Effect of Short‐Term Periodic Steroid Premedication on Bone Metabolism in Gastrointestinal Cancer (ESPRESSO‐01)
Source: PubMed Central journal article supplement — Oncologist. 2017 Mar 24;22(5):592–600. doi: 10.1634/theoncologist.2016-0308 (PMC5423502; doi:10.1634/theoncologist.2016-0308), 2017-03-24
Supplement: supp_the2016-0308_onco12081-sup-0001-s01.pdf [file supp_the2016-0308_onco12081-sup-0001-s01.pdf]

Supplemental Table for:

A Prospective Observational Study on Effect of Short-term Periodic Steroid Premedication on Bone Metabolism to Prevent Chemotherapy-induced Nausea and Vomiting in Gastrointestinal Cancer (ESPRESSO-01)

Michio Nakamura et al.

**Table S1.** Variations in BMDs and BTM levels between baseline and 16 weeks (excluding additive oral steroid or rescue steroid usage)

|                               | Baseline                                 | 16 weeks                                 | Percent change (%)                        | <i>P</i> * |
|-------------------------------|------------------------------------------|------------------------------------------|-------------------------------------------|------------|
| <b>BMD (g/cm<sup>2</sup>)</b> |                                          |                                          |                                           |            |
| Lumbar spine                  | 1.057 ± 0.194<br>(58, 1.006 to 1.108)    | 1.037 ± 0.192<br>(58, 0.986 to 1.087)    | -1.884 ± 3.358<br>(58, -2.767 to -1.001)  | <0.0001    |
| Total hip                     | 0.886 ± 0.164<br>(57, 0.843 to 0.930)    | 0.863 ± 0.171<br>(57, 0.817 to 0.908)    | -2.772 ± 5.360<br>(57, -4.194 to -1.350)  | 0.001      |
| Femoral neck                  | 0.734 ± 0.152<br>(57, 0.694 to 0.775)    | 0.719 ± 0.148<br>(57, 0.680 to 0.758)    | -2.021 ± 4.673<br>(57, -3.261 to -0.782)  | 0.002      |
| <b>BMD T-score</b>            |                                          |                                          |                                           |            |
| Lumbar spine                  | 0.047 ± 1.483<br>(58, -0.343 to 0.437)   | -0.105 ± 1.475<br>(58, -0.493 to 0.283)  | -0.152 ± 0.249<br>(58, -0.217 to -0.086)  | <0.0001    |
| Total hip                     | -0.377 ± 1.230<br>(57, -0.704 to -0.051) | -0.567 ± 1.299<br>(57, -0.911 to -0.222) | -0.190 ± 0.381<br>(57, -0.290 to -0.089)  | <0.0001    |
| Femoral neck                  | -0.916 ± 1.168<br>(57, -1.226 to -0.606) | -1.035 ± 1.157<br>(57, -1.342 to -0.728) | -0.119 ± 0.295<br>(57, -0.198 to -0.041)  | 0.003      |
| <b>BMD Z-score</b>            |                                          |                                          |                                           |            |
| Lumbar spine                  | 0.941 ± 1.015<br>(58, 0.674 to 1.208)    | 0.828 ± 0.995<br>(58, 0.566 to 1.089)    | -0.114 ± 0.201<br>(58, -0.167 to -0.061)  | <0.0001    |
| Total hip                     | 0.944 ± 1.047<br>(57, 0.666 to 1.222)    | 0.775 ± 1.110<br>(57, 0.481 to 1.070)    | -0.168 ± 0.388<br>(57, -0.271 to -0.065)  | 0.002      |
| Femoral neck                  | 0.491 ± 1.129<br>(57, 0.192 to 0.791)    | 0.363 ± 1.129<br>(57, 0.064 to 0.663)    | -0.128 ± 0.318<br>(57, -0.212 to -0.044)  | 0.004      |
| sBAP (µg/L)                   | 15.154 ± 8.500<br>(56, 12.877 to 17.430) | 17.373 ± 8.344<br>(56, 15.139 to 19.608) | 22.880 ± 41.331<br>(56, 11.811 to 33.948) | 0.045      |
| sNTX (nmolBCE/L)              | 19.155 ± 5.138<br>(56, 17.779 to 20.531) | 20.205 ± 6.851<br>(56, 18.371 to 22.040) | 6.140 ± 26.670<br>(56, -1.003 to 13.282)  | 0.119      |
| Serum calcium (mg/dL)         | 9.360 ± 0.544                            | 9.271 ± 0.455                            | -0.791 ± 4.865                            | 0.136      |

Supplemental Table for:

A Prospective Observational Study on Effect of Short-term Periodic Steroid Premedication on Bone Metabolism to Prevent Chemotherapy-induced Nausea and Vomiting in Gastrointestinal Cancer (ESPRESSO-01)

Michio Nakamura et al.

|                           |                                       | (58, 9.217 to 9.503)                  | (58, 9.151 to 9.390)                     | (58, -2.070 to 0.488) |  |
|---------------------------|---------------------------------------|---------------------------------------|------------------------------------------|-----------------------|--|
| Corrected calcium (mg/dL) | 9.715 ± 0.440<br>(58, 9.599 to 9.831) | 9.528 ± 0.437<br>(58, 9.413 to 9.642) | -1.873 ± 3.051<br>(58, -2.675 to -1.070) | <0.0001               |  |
| Serum albumin (g/dL)      | 3.598 ± 0.561<br>(58, 3.451 to 3.746) | 3.726 ± 0.420<br>(58, 3.615 to 3.836) | 5.353 ± 16.056<br>(58, 1.131 to 9.575)   | 0.031                 |  |

Abbreviations: BCE, bone collagen equivalent; BMD, bone mineral density; BTM bone turnover marker; sBAP, serum bone-specific alkaline phosphatase; sNTX, serum N-terminal telopeptide of type I collagen

Data represent the mean ± standard deviation (number, 95% confidence interval).

\* Paired Student's t-test between baseline and 16weeks

**Corrected calcium level** = Serum calcium level + 0.8 (4 – serum albumin level)
